# Supplementary material
Source: PubMed Central journal article supplement (PMC2742919)
Supplement: NIHMS120736-supplement-Supporting_Info_.pdf [file NIHMS120736-supplement-Supporting_Info_.pdf]

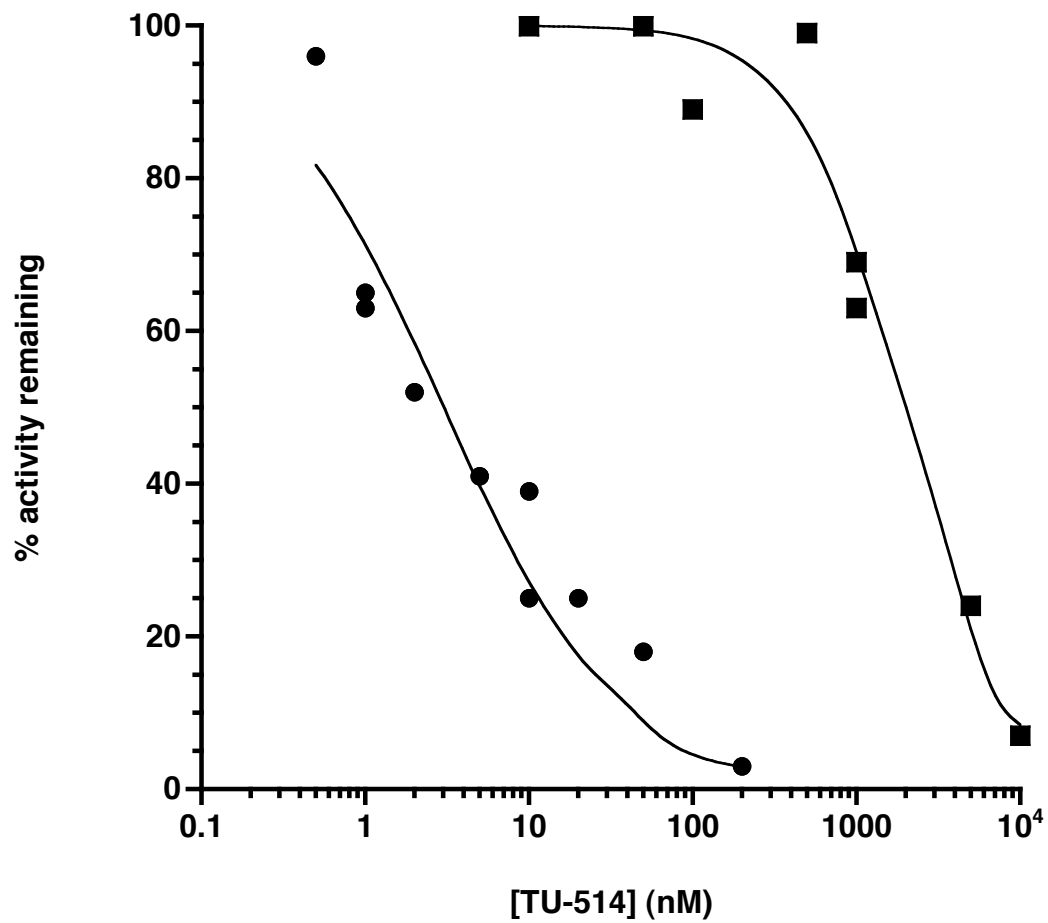

**Supplemental Figure 1. Inhibition of AaLpxC by TU-514 at pH 7.4 or pH 5.5.** The IC<sub>50</sub> of TU-514, determined at pH 7.4 (circles), is 2 nM, but at pH 5.5 (squares) it is 2 μM.
